# Supplementary material for: Human Glycolipid Transfer Protein (GLTP) Expression Modulates Cell Shape
Source: PubMed Central journal article supplement (PMC3097243; doi:10.1371/journal.pone.0019990), 2011-05-18

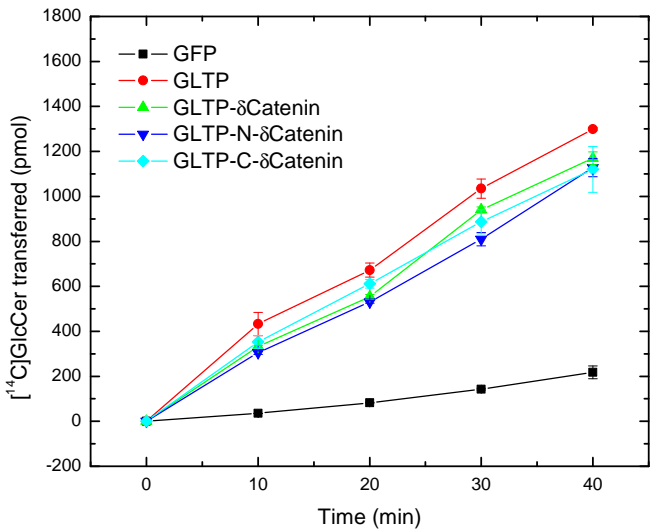

Supplement: pone.0019990.s004.pdf [file pone.0019990.s004.pdf]
